# Supplementary material for: Coaxial silicon nanowires as solar cells and nanoelectronic power sources
Source: Springer Nature journal article supplement (doi:10.1038/nature06181), 2007-10-01
Supplement: 41586_2007_BFnature06181_MOESM15_ESM.pdf [file 41586_2007_BFnature06181_MOESM15_ESM.pdf]

Figure S1

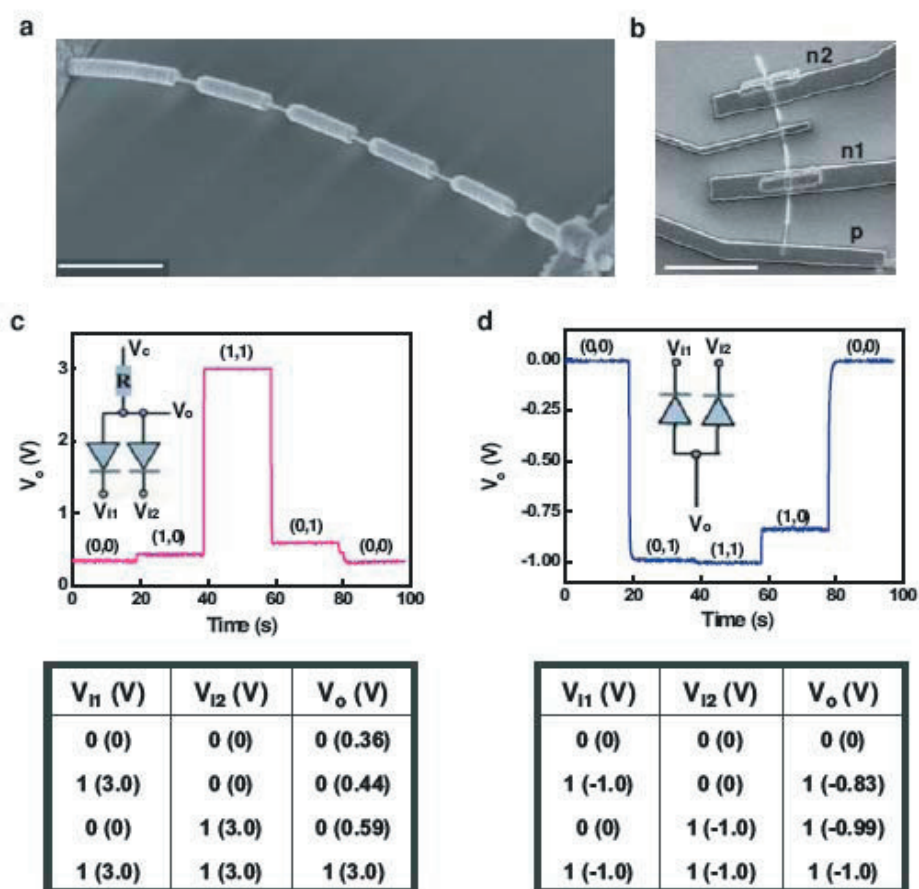

**Figure S1 | Periodically etched core/shell SiNW (a) and single NW logic gates (b-d).** a, SEM image of the selectively-etched *p-i-n* coaxial SiNW. Scale bar, 2  $\mu\text{m}$ . b, SEM image of the logic gate device, scale bar, 10  $\mu\text{m}$ . Single SiNW AND

(c) and OR (d) logic gates, equivalent circuits (inset of upper panel) and truth tables (lower panel).  $V_c$  and  $R$  in (c) are 3 V and 25 M $\Omega$ , respectively; numbers in parenthesis are measured input and output voltages in the experiments.

Figure S2

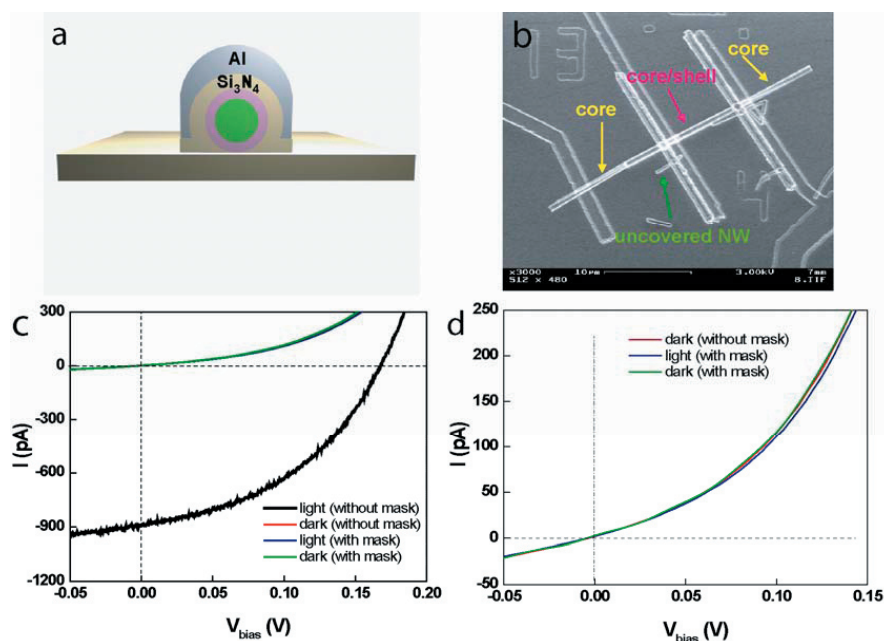

**Figure S2 | Nanowire masking experiment.** (a) Side-view schematic illustrating the mask structure used in our experiments. Electron beam lithography was used to write a  $\leq 800$  nm wide slot aligned with the nanowire device, and then 100 nm of  $\text{Si}_3\text{N}_4$  and 200 nm of Al were deposited over the nanowire. The transmission through the mask is  $<1\%$  over the entire region of the solar

spectrum. (b) Scanning electron microscopy image of the masked nanowire device used for the measurements. (c) Illuminated and dark I-V data recorded on the nanowire device with and without Al/ $\text{Si}_3\text{N}_4$  mask. (d) Zoom of the illuminated/dark data recorded with the mask and the dark data recorded without the mask.
